1

2 Peptidoglycan layer and disruption processes in *Bacillus subtilis* cells  
3 visualized using quick-freeze, deep-etch electron microscopy

4

5 Isil Tulum<sup>a,b,1</sup>, Yuhei O Tahara<sup>a,b,1</sup>, Makoto Miyata<sup>a,b,2</sup>

6

7 <sup>a</sup> Graduate School of Science, Osaka City University, Osaka, 558-8585, Japan. <sup>b</sup>

8 The OCU Advanced Research Institute for Natural Science and Technology  
9 (OCARINA), Osaka City University, Osaka, 558-8585, Japan.

10

11

12 **Abstract**

13 Peptidoglycan, which is the main component of the bacterial cell wall, is a  
14 heterogeneous polymer of glycan strands crosslinked with short peptides and is  
15 synthesized in cooperation with the cell division cycle. Although it plays a critical  
16 role in bacterial survival, its architecture is not well understood. Herein, we  
17 visualized the architecture of the peptidoglycan surface in *Bacillus subtilis* at the  
18 nanometer resolution, using quick-freeze, deep-etch electron microscopy.  
19 Filamentous structures were observed on the entire surface of the cell, where  
20 filaments about 11-nm wide formed concentric circles on cell poles, filaments  
21 about 13-nm wide formed a circumferential mesh-like structure on the cylindrical  
22 part, and a "piecrust" structure was observed at the boundary. When growing  
23 cells were treated with lysozyme, the entire cell mass migrated to one side and  
24 came out from the cell envelope. Fluorescence labeling showed that lysozyme  
25 preferentially bound to a cell pole and cell division site, where the peptidoglycan  
26 synthesis was not complete. Ruffling of surface structures was observed during  
27 electron microscopy. When cells were treated with penicillin, the cell mass came  
28 out from a cleft around the cell division site. Outward curvature of the protoplast  
29 at the cleft seen using electron microscopy suggested that turgor pressure was  
30 applied as the peptidoglycan was not damaged at other positions. When  
31 mucopeptides were depleted, surface filaments were lost while the rod shape  
32 of the cell was maintained. These changes can be explained on the basis of the  
33 working points of the chemical structure of peptidoglycan.

34

35 Keywords: Lysozyme, Penicillin, Piecrust, L-form, MurE, Turgor

36

37 **Significance Statement**

38 Bacteria, the major inhabitants of the Earth, are in a constant battle to outlast  
39 their competitors in the environment and the immune system of host organisms.  
40 Most bacterial cells are surrounded by a rigid shield called the "peptidoglycan  
41 layer," which protects them from chemical agents, including lytic enzymes and  
42 antibiotics, that are produced by their competitors. In this study, we visualized  
43 this layer that protects the bacteria from these agents using quick-freeze,  
44 deep-etch electron microscopy, a special technique that can be used to visualize

45 detailed structures on bacterial surfaces in high spatial and time resolutions.

46

## 47 **Introduction**

48 Peptidoglycan is an essential component of the bacterial cell wall that is found  
49 on the outside of the cytoplasmic membrane of almost all bacterial cells except  
50 the class *Mollicutes*. This polymer provides strength, rigidity, and shape stability  
51 by maintaining turgor pressure (1-4). In peptidoglycan, the glycan strands  
52 comprise alternating  $\beta$ -1,4-linked *N*-acetylglucosamine (GlcNAc) and  
53 *N*-acetylmuramic acid (MurNAc), and the peptide stems are covalently linked to  
54 the glycan strands with an amide bond to the carboxyl carbon of the MurNAc.

55 The peptidoglycan layer is also the site of action for antimicrobial agents.

56 Lysozyme, an antimicrobial enzyme critical in animal host defense, is one of the  
57 most abundant proteins present on the mucosal surfaces and in body secretions,  
58 such as saliva and tears (5, 6). The epithelial cells secrete lysozyme to protect  
59 the host's mucosal surfaces from infectious bacteria. Lysozyme is also present in  
60 white blood cells, especially in granules of phagocytes, where it helps in the  
61 elimination of infectious bacteria within phagolysosomes. The underlying  
62 mechanism of action of lysozyme involves breaking the bond between GlcNAc  
63 and MurNAc (muramidase activity) leading to the degradation of peptidoglycan.  
64 On the other hand, fungi and bacteria produce secondary metabolites in defense  
65 against predators and competitors (7, 8). A well-known group of secondary  
66 metabolites is beta-lactams, a broad class of antibiotics that include penicillin  
67 derivatives, cephalosporins, monobactams, and carbapenems. Beta-lactams  
68 inhibit peptidoglycan synthesis by covalently binding to the active site of  
69 transpeptidases, known as penicillin-binding proteins (PBPs), and cause  
70 changes in bacterial cell shape and lead to cell lysis.

71 This property makes peptidoglycan a vitally important target of beta-lactam  
72 antibiotics. Therefore, peptidoglycan architecture and the processes that are  
73 used to disrupt it are valuable to understand the survival strategies of bacteria  
74 and to control pathogenic bacteria. However, the architecture of peptidoglycan is  
75 not well understood, because the structure is featured with low density, high  
76 flexibility, and is multilayered, which are characteristics that make it unsuitable to  
77 be observed using transmission electron microscopy (EM)(2, 9-13).

78 Quick-freeze, deep-etch replica EM was introduced in order to visualize  
79 synaptic transmission processes in 1979, and it has emerged as a useful tool  
80 that can be applied for the visualization of many other biological phenomena (14).  
81 It is an advanced technology that is used to visualize biological specimens in an  
82 active state as a shot image, with spatial resolution of the nanometer order and  
83 time resolution of sub milliseconds, because the specimen is frozen quickly by  
84 pressing it against a metal block chilled with liquid helium or liquid nitrogen and  
85 shadowed by platinum with high contrast. Therefore, this method has great  
86 advantages when used to visualize low density and flexible structures in  
87 comparison to other methods of transmission EM.

88 *Bacillus subtilis* is a rod-shaped, Gram-positive, non-pathogenic bacterium  
89 that belongs to the phylum *Firmicutes* (1). The genus *Bacillus* also includes  
90 human pathogens such as *Bacillus anthracis* and *Bacillus cereus* (15) and is  
91 related to the genus *Clostridium*. Therefore, *B. subtilis* can be an attractive  
92 model for the clarification of the architecture and the roles of the cell wall. In this  
93 study, the detailed structures of the peptidoglycan layer and its disruption  
94 processes in *B. subtilis* were analyzed using the quick-freeze, deep-etch EM and  
95 optical microscopy.

96

## 97 **Results**

### 98 **Surface structure of *Bacillus subtilis***

99 To visualize the structure of the peptidoglycan layer, *B. subtilis* was observed for  
100 the first time by the quick-freeze, deep-etch EM. Cells in exponential growth  
101 phase were collected by centrifugation and placed on glass, frozen, fractured,  
102 deeply etched, shadowed with platinum, and then the platinum replicas were  
103 recovered and observed. The shape and dimensions of the cells were consistent  
104 with the images of living cells obtained by optical microscopy (Fig. 1A, B).  
105 Filamentous structures were clearly observed on the cell surface and can be  
106 distinguished between the cell pole and the cylindrical part on the rod-shaped  
107 cells (Fig. 1C, D and Movie S1). The thick filaments  $12.7 \pm 0.4$  nm wide were  
108 aligned in partial circumferential manner on the cylindrical part. The filament  
109 widths were measured based on the image profile (Fig. S1). The thin filaments  
110  $10.9 \pm 0.3$  nm wide were concentrically arranged around the both poles with a

111 pitch of  $11.3 \pm 0.4$  nm (Fig. 1E, F).

112 On elongated cells prior to cell division, invagination was observed at the  
113 central position of the axis, and an obvious boundary was found between the  
114 cylindrical part and the surface of the invagination (Fig. 1G). Obvious  
115 filamentous structures were not found on the surface of the invagination. A wall  
116  $24.8 \pm 1.6$  nm wide was observed between the surface of the invagination and  
117 the cylindrical part (Fig. 1G). This small wall was also found in cells after division  
118 (Fig. 1H), but not in isolated single cells (Fig. 1D).

119

### 120 **Peptidoglycan disruption by lysozyme**

121 Next, we examined how the peptidoglycan layer is disrupted by lysozyme. We  
122 added lysozyme from the egg white to growing cells, and observed the changes  
123 occurring on the cell structures by phase-contrast optical microscopy (Fig. 2A).  
124 The effects of lysozyme on *B. subtilis* cells were consistent with previous reports,  
125 although we traced the changes in more detail (5, 16, 17). In the present  
126 observation, the cell mass started to detach from the envelope structure around  
127 30 minutes after the addition of lysozyme and moved to one side over time.  
128 Finally, all the mass was localized as a sphere at one side of the cell envelope.  
129 After a 60 minute treatment, 100% of the cells ( $n = 72$ ) were converted to  
130 protoplast.

131 In order to locate the sites where lysozyme works on the cell in this process,  
132 we labeled lysozyme fluorescently and traced where it attached (Fig. 2B). After  
133 10 minutes, the labeled lysozyme bound to the whole cell surface but  
134 preferentially bound to the division site and a cell pole. The changes in lysozyme  
135 localization over time were traced through live imaging (Fig. 2C). The signal  
136 found at a pole decreased with time and disappeared at 40 minutes. The signal  
137 on parts other than the cell poles remained for 40 minutes, and then it moved  
138 to one side. The disappearance of lysozyme signal should suggest the  
139 dissociation of lysozyme from envelope, caused by the complete digestion of the  
140 target sites on the peptidoglycan layer.

141 Next, we observed the structural changes on cell surface at high resolution  
142 using the quick-freeze, deep-etch EM (Fig. 2D-E). At 20 minutes after the  
143 addition of lysozyme, ruffling of the surface structure was observed around a cell

144 pole, which is probably corresponding to the area to which lysozyme bound on  
145 the cell. The peptidoglycan layer should detach from the cell partly by the  
146 degradation of the sugar chain. At 60 minutes, the ruffling parts became  
147 restrictive, which is consistent with the observation that the area of lysozyme  
148 binding became restrictive in the fluorescence microscopy. Instead of ruffling, we  
149 found coarse patterns on the cylindrical part of cells and spherical structures  
150 with a smooth surface, suggesting that lysozyme moved and digested the  
151 peptidoglycan at the cylindrical parts.

152

### 153 **Peptidoglycan disruption by penicillin**

154 The process of peptidoglycan disruption by the effect of penicillin was examined  
155 (Fig. 3). Beginning 30 minutes after the addition of 100  $\mu\text{g}/\text{mL}$  Penicillin G  
156 (PenG) to the growing culture, a less dense and flexible structure was observed  
157 to project from a side position on a cell under optical microscopy (Fig. 3A). At  
158 120 minutes, 89% of the cells ( $n = 172$ ) were released from the peripheral  
159 structure probably as a protoplast.

160 Next, the cells damaged by PenG treatment for 120 minutes were observed  
161 by the quick-freeze, deep-etch EM (Fig. 3B, C). The images were defined by  
162 eutectics, which should be caused by the cytosol eluted from damaged cells,  
163 because generally some ions and polymers form eutectics in the quick-freeze,  
164 deep-etch EM (18). The cell images showed various stages of the process by  
165 which a protoplast comes out from the cell envelope. In many cases, the  
166 cytoplasm came out from the central position of the cell where the cell division  
167 should be scheduled (Fig. 3C). Unlike the effect of lysozyme, the cytoplasm in  
168 the early stage of cell disruption seemed to be subjected to strong turgor,  
169 because the protoplasts coming through the cleft had some outward curvature.

170

### 171 **Peptidoglycan disruption by *murE* operon repression**

172 The repression of the *murE* operon ceases supplying muropeptides, induces the  
173 gentle degradation of the peptidoglycan layer, and then results in the transfer of  
174 *B. subtilis* cells into L-form (19, 20). This process was visualized by  
175 phase-contrast optical microscopy (Fig. 4A). When the *murE* operon was  
176 repressed for 80 minutes, the cell morphology was disturbed mostly around cell

177 poles, featured by a tapered pole, and the detachment of cell mass from the pole.  
178 Time lapse imaging of cells showed that these two features occurred in a  
179 sequential manner. In those cells, finally the cell became spherical, which may  
180 proliferate as L-form. These processes agree with those previously reported (19,  
181 20). Next, we visualized the cells by the quick-freeze, deep-etch EM. Irregular  
182 cell shapes were obvious under this method, including asymmetric cell division,  
183 tapered cell pole (Fig. 4B), and spherical extension at a cell pole (Fig. 4C, left).  
184 The filaments on the cell surfaces were unclear compared to the original cells or  
185 totally lacking (Fig. 4C, left and middle). On the spherical cells, no filaments were  
186 found on the surface, supporting our assumption that the filaments observed in  
187 the quick-freeze, deep-etch EM are derived from the peptidoglycan layer (Fig.  
188 4C, right).

189

## 190 **Discussion**

### 191 **Visualization of peptidoglycan layer by quick-freeze, deep-etch EM**

192 The images obtained by the quick-freeze, deep-etch EM may appear like those  
193 from Scanning Electron Microscopy (SEM), but they are featured by 10 folds  
194 higher spatial resolution and sub-millisecond time resolution. This method  
195 should be very efficient for research of microorganisms whose interaction with  
196 the environment on their surface is critical for many activities (14, 21, 22). In the  
197 present study, the quick-freeze, deep-etch EM was applied to the visualization of  
198 the peptidoglycan and its disruption process, for the first time. The results  
199 showed the details of filamentous structures in nanometer resolution and its  
200 change with time resolution, as expected.

201 In normally growing cells, the alignments of the peptidoglycan filaments  
202 were clearly distinguished between the poles and the cylindrical part (Figs. 1 and  
203 5A left). This was consistent with the knowledge from molecular biology that  
204 peptidoglycan synthase is localized by MreB when cells are elongating and the  
205 synthase is localized at the division site by FtsZ during cell division (23, 24). The  
206 concentric pattern in the pole is considered to be common to the structure  
207 previously observed by a related method, the freeze fracture of fixed cells of  
208 *Staphylococcus* (25). Atomic Force Microscopy (AFM) of the peptidoglycan  
209 showed circular pattern for *B. subtilis* (12) and also for *Lactococcus lactis* (11).

210 The circular pattern observed in the present study may be general in *Firmicute*  
211 bacterial species, although the appearance depends on the visualizing methods.  
212 A small wall structure was seen at the boundary between the surfaces of the  
213 invaginating part and the cylindrical part (Fig. 1G, H). This structure should  
214 correspond to a structure named “wall band” observed in sectioned EM images  
215 (26, 27). A similar structure is known as “piecrust” in SEM observation of  
216 *Staphylococcus aureus* (25), although it has not been observed in SEM images  
217 of *B. subtilis* (2). In previous observations of *B. subtilis* using SEM, the low  
218 resolution and chemical fixation processes interfered with the visualization of the  
219 piecrusts. The filament pattern observed on the cylindrical part is a  
220 circumferential mesh-like structure similar to the pattern observed for the  
221 isolated peptidoglycan layer of *Escherichia coli* using AFM, although the filament  
222 widths are different (9). Perhaps, the filaments in the cylindrical part may be  
223 aligned roughly in a circumferential way, generally in rod shaped bacteria (10, 12,  
224 13).

225 Based on the observation here, we can suggest a scheme for cell surface  
226 structures in cell division cycles (Fig. 5A left).

227

### 228 **Lysozyme starts from new pole and division site**

229 In the present study, the disruption process of the peptidoglycan layer was  
230 visualized for each of the three factors with different working points (Fig. 5A right,  
231 B). In the process, lysozyme preferentially bound to a cell pole and a cell division  
232 site (Fig. 2B). Probably, the newly synthesized peptidoglycan has many gaps,  
233 which lysozyme molecules can access easily. The tracking of lysozyme showed  
234 that it detached from the initially bound position earlier than it did the other parts,  
235 suggesting that the peptidoglycan digestion was completed at the cell pole (Fig.  
236 2C). Even when pathogenic or parasitic bacteria invade the host, the division site  
237 and the new pole is preferentially attacked by lysozyme. We focused on *B.*  
238 *subtilis* inhabiting the environment in the present study, but the process by which  
239 lysozyme attacks pathogenic or parasitic bacteria should also be very  
240 interesting.

241 Quick-freeze, deep-etch EM showed that the action of lysozyme loosens the  
242 peptidoglycan. As lysozyme cleaves carbohydrate chains that mainly form the



243 filaments of the peptidoglycan layer (Fig. 5B)(6), the peptidoglycan layer  
244 separates from the cell surface (Fig. 2E). This damage on the entire  
245 peptidoglycan layer is as effective as the protection system that is involved in the  
246 resistance against invasion by pathogenic or parasitic bacteria.

247

#### 248 **Turgor by penicillin treatment**

249 In the early stage of cell disruption by PenG, large turgor appeared to be applied  
250 to the cytoplasm at the cell division site from the cell inside, because the cell  
251 membrane at a cleft of the cell envelope showed curvature to outside (Figs. 3C  
252 and 5A right). In the process by lysozyme, such turgor was not observed. This  
253 difference can be explained by the disruption mechanisms (Fig. 5B)(5, 6, 28). As  
254 PenG inhibits only *de novo* crosslinking of peptidoglycan, the matured parts of  
255 the peptidoglycan layer apply turgor to the cell. However, the damages by  
256 lysozyme disrupt whole parts of cell envelope.

257

#### 258 **Change in surface pattern after *murE* operon repression**

259 When the supply of muropeptide was stopped, the cell shape was disturbed  
260 around the cell pole (Figs. 4 and 5A right). At that time, the features of the  
261 pattern on the surface were also lost. Since the peptidoglycan layer of *B. subtilis*  
262 is 20–40 nm thick, insertion of newly synthesized filaments into the  
263 peptidoglycan layer through muropeptide supply is thought to occur on the side  
264 close to the membrane (29, 30). If it is true, the influence on the surface pattern  
265 of the muropeptide depletion should occur in the final stage of morphological  
266 change. In fact, a noticeable change in pattern was observed when the cells  
267 were still maintaining the rod shape (Fig. 4C). This may suggest that there is  
268 fluidity in the existing peptidoglycan filaments (30, 31).

269

#### 270 **Materials and Methods**

271 **Bacterial strains and media.** *Bacillus subtilis* 168 CA and LR2, a strain  
272 inducible for L-form derived from *B. subtilis* 168 CA (5, 32) were used. Nutrient  
273 agar (NA, Oxoid) was used for routine selection and maintenance of *B. subtilis*  
274 168 CA. Luria–Bertani (LB), nutrient broth (NB, Oxoid), and SMM-defined  
275 minimal medium (Spizizen) containing 0.5% xylose or 1 mM isopropyl

276  $\beta$ -D-1-thiogalactopyranoside (IPTG) were used when required.

277

278 **Treatment of cells.** Cultured cells around optical density (OD) at 0.2 in 600 nm  
279 wavelength, a middle exponential stage, were collected by centrifugation at  
280 8,000  $\times g$ , room temperature (RT) for 3 minutes. For lysozyme treatment, the  
281 cells were suspended in phosphate-buffered saline consisting of 75 mM sodium  
282 phosphate (pH 7.3) and 68 mM NaCl to be the original cell density. Lysozyme  
283 was added to the cell suspension at final concentration of 0.1 mg/mL and kept at  
284 37°C without shaking. For PenG treatment, cultured cells were collected and  
285 suspended in a new medium at the original cell density. PenG was added at the  
286 final concentration of 0.1 mg/mL and kept at 37°C with shaking. To induce the  
287 L-form transition, 2  $\times$  MSM osmoprotective medium (40 mM MgCl<sub>2</sub>, 1 M sucrose  
288 and 40 mM maleic acid, pH 7.0) was mixed with the same volume of 2  $\times$  NB or 2  
289  $\times$  NA. L-form liquid cultivation was done in NB/MSM at 30°C without shaking (32).  
290 Lysozyme hydrochloride, from egg white (Wako Pure Chemical Industries,  
291 Osaka, Japan) was labeled with DyLight 488 NHS Ester (Thermo Fisher  
292 Scientific, Rockford, IL), according to the instruction.

293

294 **Optical microscopy.** The cells were inserted into a tunnel chamber with a 5-mm  
295 interior width, a 22-mm length, and an 86- $\mu$ m wall thickness (33). The tunnel  
296 chamber was constructed with a coverslip and a glass slide and assembled with  
297 double-sided tape. Fluorescence microscopy was performed with a BX51  
298 fluorescence microscope equipped with a YFP filter unit (U-MYFPHQ) and a  
299 phase-contrast setup (Olympus, Tokyo, Japan). Images were captured with a  
300 WAT-120NRC charge-coupled-device (CCD) camera (Watec, Yamagata, Japan)  
301 and analyzed using ImageJ 1.52.

302

303 **Quick-freeze, deep-etch EM.** The cells were collected by centrifugation and  
304 suspended in a buffer consisting of 1 mM MgCl<sub>2</sub> and 0.1 mg/mL DNase I to be  
305 20 folds higher cell density. The cell suspension was mixed with a slurry that  
306 included mica flakes, placed on a rabbit lung slab, and frozen by a CryoPress  
307 (Valiant Instruments, St. Louis, MO) cooled by liquid helium. The specimens  
308 were fractured and etched for 15 minutes at -104°C, in a JFDV freeze-etching

309 device (JEOL Ltd, Akishima, Japan). The exposed cells were rotary-shadowed  
310 by platinum at an angle of 20 degree to be 2 nm in thickness and backed with  
311 carbon. Replicas were floated off on full-strength hydrofluoric acid, rinsed in  
312 water, cleaned with a commercial bleach, rinsed in water, and picked up onto  
313 copper grids as described (34). Replica specimens were observed by a  
314 JEM-1010 transmission electron microscope (JEOL, Tokyo, Japan) at 80 kV  
315 equipped with a FastScan-F214 (T) CCD camera (TVIPS, Gauting, Germany).  
316 For tomography, cell replicas were observed by Talos F200C G2 (Thermo fisher  
317 Scientific, Waltham, MA, USA) at 200 kV, and image sets were acquired every  
318 degree of angle for 96 steps, by a complementary metal–oxide–semiconductor  
319 (CMOS) camera (Ceta camera, FEI). The images were analyzed by ImageJ.

320

### 321 **Acknowledgements**

322 We appreciate the helpful input from Eisaku Katayama at Osaka City University  
323 and Daisuke Shiomi at Rikkyo University, gift of *Bacillus subtilis* strains from  
324 Yoshikazu Kawai at Newcastle University, and technical support from Junko  
325 Shiomi at Osaka City University. The application of quick-freeze, deep-etch EM  
326 technique to microbiology was developed as the general supporting project for  
327 the Grant-in-Aid for Scientific Research on Innovative Areas “Harmonized  
328 Supramolecular Motility Machinery and Its Diversity” (25117501) directed by  
329 MM. This work was supported by a Grant-in-Aid for Scientific Research on the  
330 Innovative Area “Harmonized Supramolecular Motility Machinery and Its  
331 Diversity” (MEXT KAKENHI Grant Number 24117002) and by Grant-in-Aids for  
332 Scientific Research (B) and (A) (MEXT KAKENHI Grant Numbers 24390107 and  
333 17H01544) to MM.

334

### 335 **Footnotes**

336 <sup>1</sup>I.T. and Y.O.T. contributed equally to this work.

337 <sup>2</sup> To whom correspondence should be addressed. Email:

338 [miyata@sci.osaka-cu.ac.jp](mailto:miyata@sci.osaka-cu.ac.jp).

339 Author contributions: All authors contributed to the research design, analyzing  
340 data and writing the paper; I.T. and Y.O.T. performed the experiments. The  
341 authors declare no conflict of interest.

342 **Reference**

- 343 1. Errington J (2013) L-form bacteria, cell walls and the origins of life. *Open Biol* 3(1):120143.
- 344 2. Turner RD, Vollmer W, & Foster SJ (2014) Different walls for rods and balls: the diversity of  
345 peptidoglycan. *Mol Microbiol* 91(5):862-874.
- 346 3. Erickson HP (2017) How bacterial cell division might cheat turgor pressure - a unified  
347 mechanism of septal division in Gram-positive and Gram-negative bacteria. *Bioessays* 39(8).
- 348 4. Osawa M & Erickson HP (2018) Turgor pressure and possible constriction mechanisms in  
349 bacterial division. *Front Microbiol* 9:111.
- 350 5. Kawai Y, Mickiewicz K, & Errington J (2018) Lysozyme counteracts beta-lactam antibiotics by  
351 promoting the emergence of L-form bacteria. *Cell* 172(5):1038-1049 e1010.
- 352 6. Ragland SA & Criss AK (2017) From bacterial killing to immune modulation: Recent insights  
353 into the functions of lysozyme. *PLoS Pathog* 13(9):e1006512.
- 354 7. Stulberg ER, *et al.* (2016) Genomic and secondary metabolite analyses of *Streptomyces* sp. 2AW  
355 provide insight into the evolution of the cycloheximide pathway. *Front Microbiol* 7:573.
- 356 8. Kunzler M (2018) How fungi defend themselves against microbial competitors and animal  
357 predators. *PLoS Pathog* 14(9):e1007184.
- 358 9. Turner RD, Mesnage S, Hobbs JK, & Foster SJ (2018) Molecular imaging of glycan chains  
359 couples cell-wall polysaccharide architecture to bacterial cell morphology. *Nat Commun*  
360 9(1):1263.
- 361 10. Beeby M, Gumbart JC, Roux B, & Jensen GJ (2013) Architecture and assembly of the  
362 Gram-positive cell wall. *Mol Microbiol* 88(4):664-672.
- 363 11. Andre G, *et al.* (2010) Imaging the nanoscale organization of peptidoglycan in living  
364 *Lactococcus lactis* cells. *Nat Commun* 1:27.
- 365 12. Hayhurst EJ, Kailas L, Hobbs JK, & Foster SJ (2008) Cell wall peptidoglycan architecture in  
366 *Bacillus subtilis*. *Proc Natl Acad Sci U S A* 105(38):14603-14608.
- 367 13. Gan L, Chen S, & Jensen GJ (2008) Molecular organization of Gram-negative peptidoglycan.  
368 *Proc Natl Acad Sci U S A* 105(48):18953-18957.
- 369 14. Heuser JE (2011) The origins and evolution of freeze-etch electron microscopy. *J Electron*  
370 *Microsc (Tokyo)* 60 Suppl 1:S3-29.
- 371 15. Swick MC, Koehler TM, & Driks A (2016) Surviving between hosts: sporulation and  
372 transmission. *Microbiol Spectr* 4(4).
- 373 16. Weibull C (1953) The isolation of protoplasts from *Bacillus megaterium* by controlled treatment  
374 with lysozyme. *J Bacteriol* 66(6):688-695.
- 375 17. Muchova K, Wilkinson AJ, & Barak I (2011) Changes of lipid domains in *Bacillus subtilis* cells  
376 with disrupted cell wall peptidoglycan. *FEMS Microbiol Lett* 325(1):92-98.
- 377 18. Miller KR, Prescott CS, Jacobs TL, & Lassignal NL (1983) Artifacts associated with  
378 quick-freezing and freeze-drying. *J Ultrastruct Res* 82(2):123-133.
- 379 19. Dominguez-Cuevas P, Mercier R, Leaver M, Kawai Y, & Errington J (2012) The rod to L-form

- 380 transition of *Bacillus subtilis* is limited by a requirement for the protoplast to escape from the  
381 cell wall sacculus. *Mol Microbiol* 83(1):52-66.
- 382 20. Leaver M, Dominguez-Cuevas P, Coxhead JM, Daniel RA, & Errington J (2009) Life without a  
383 wall or division machine in *Bacillus subtilis*. *Nature* 457(7231):849-853.
- 384 21. Hung C, *et al.* (2013) *Escherichia coli* biofilms have an organized and complex extracellular  
385 matrix structure. *MBio* 4(5):e00645-00613.
- 386 22. Yoshida S, *et al.* (2006) Microtubule-severing activity of *Shigella* is pivotal for intercellular  
387 spreading. *Science* 314(5801):985-989.
- 388 23. Cabeen MT & Jacobs-Wagner C (2007) Skin and bones: the bacterial cytoskeleton, cell wall, and  
389 cell morphogenesis. *J Cell Biol* 179(3):381-387.
- 390 24. Typas A, Banzhaf M, Gross CA, & Vollmer W (2011) From the regulation of peptidoglycan  
391 synthesis to bacterial growth and morphology. *Nat Rev Microbiol* 10(2):123-136.
- 392 25. Amako K, Umeda A, & Murata K (1982) Arrangement of peptidoglycan in the cell wall of  
393 *Staphylococcus* spp. *J Bacteriol* 150(2):844-850.
- 394 26. Burdett ID (1979) Electron microscope study of the rod-to-coccus shape change in a  
395 temperature-sensitive rod- mutant of *Bacillus subtilis*. *J Bacteriol* 137(3):1395-1405.
- 396 27. Burdett ID & Higgins ML (1978) Study of pole assembly in *Bacillus subtilis* by computer  
397 reconstruction of septal growth zones seen in central, longitudinal thin sections of cells. *J*  
398 *Bacteriol* 133(2):959-971.
- 399 28. Monahan LG, *et al.* (2014) Rapid conversion of *Pseudomonas aeruginosa* to a spherical cell  
400 morphotype facilitates tolerance to carbapenems and penicillins but increases susceptibility to  
401 antimicrobial peptides. *Antimicrob Agents Chemother* 58(4):1956-1962.
- 402 29. Kim SJ, Chang J, & Singh M (2015) Peptidoglycan architecture of Gram-positive bacteria by  
403 solid-state NMR. *Biochim Biophys Acta* 1848(1 Pt B):350-362.
- 404 30. Zhao H, Patel V, Helmann JD, & Dorr T (2017) Don't let sleeping dogmas lie: new views of  
405 peptidoglycan synthesis and its regulation. *Mol Microbiol* 106(6):847-860.
- 406 31. Shi H, Bratton BP, Gitai Z, & Huang KC (2018) How to build a bacterial cell: MreB as the  
407 foreman of *E. coli* construction. *Cell* 172(6):1294-1305.
- 408 32. Mercier R, Kawai Y, & Errington J (2013) Excess membrane synthesis drives a primitive mode  
409 of cell proliferation. *Cell* 152(5):997-1007.
- 410 33. Kasai T, Hamaguchi T, & Miyata M (2015) Gliding motility of *Mycoplasma mobile* on uniform  
411 oligosaccharides. *J Bacteriol* 197(18):2952-2957.
- 412 34. Miyata M & Petersen JD (2004) Spike structure at the interface between gliding *Mycoplasma*  
413 *mobile* cells and glass surfaces visualized by rapid-freeze-and-fracture electron microscopy. *J*  
414 *Bacteriol* 186(13):4382-4386.
- 415
- 416
- 417

418 **LEGENDS**

419 **Movie S1.** Tomogram of isolated cell for 96 degrees. The cylindrical and cell  
420 pole parts are colored differently in a still image at zero angle.

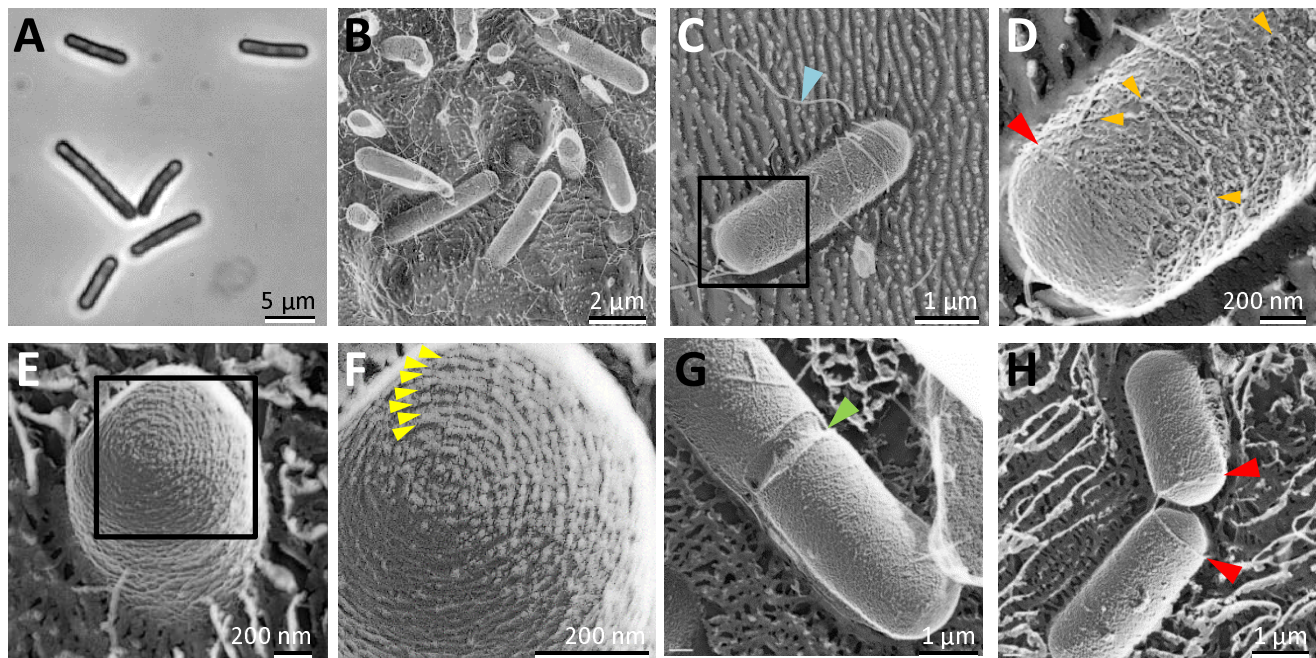

**Fig. 1.** Surface structures of *Bacillus subtilis* 168 CA strain cells visualized by quick-freeze, deep-etch EM. **A)** Phase-contrast optical microscopy of cells. **B)** Field image of cells. **C-H)** Magnified cell images. **C)** Side view. A flagellum is marked by a blue triangle. A boxed area is magnified in (D). **D)** Magnified cell surface image. Filaments on the cylindrical part are marked by orange triangles. The boundary between the cylindrical and pole parts are marked by a red triangle. **E)** Pole view. A boxed area is magnified in (F). **F)** Magnified pole surface image. Concentric circles are marked by yellow triangles. **G)** Dividing cell. The invagination is marked by a green triangle. **H)** Daughter cells probably just after cell division. Piecrust structures are marked by red triangles.

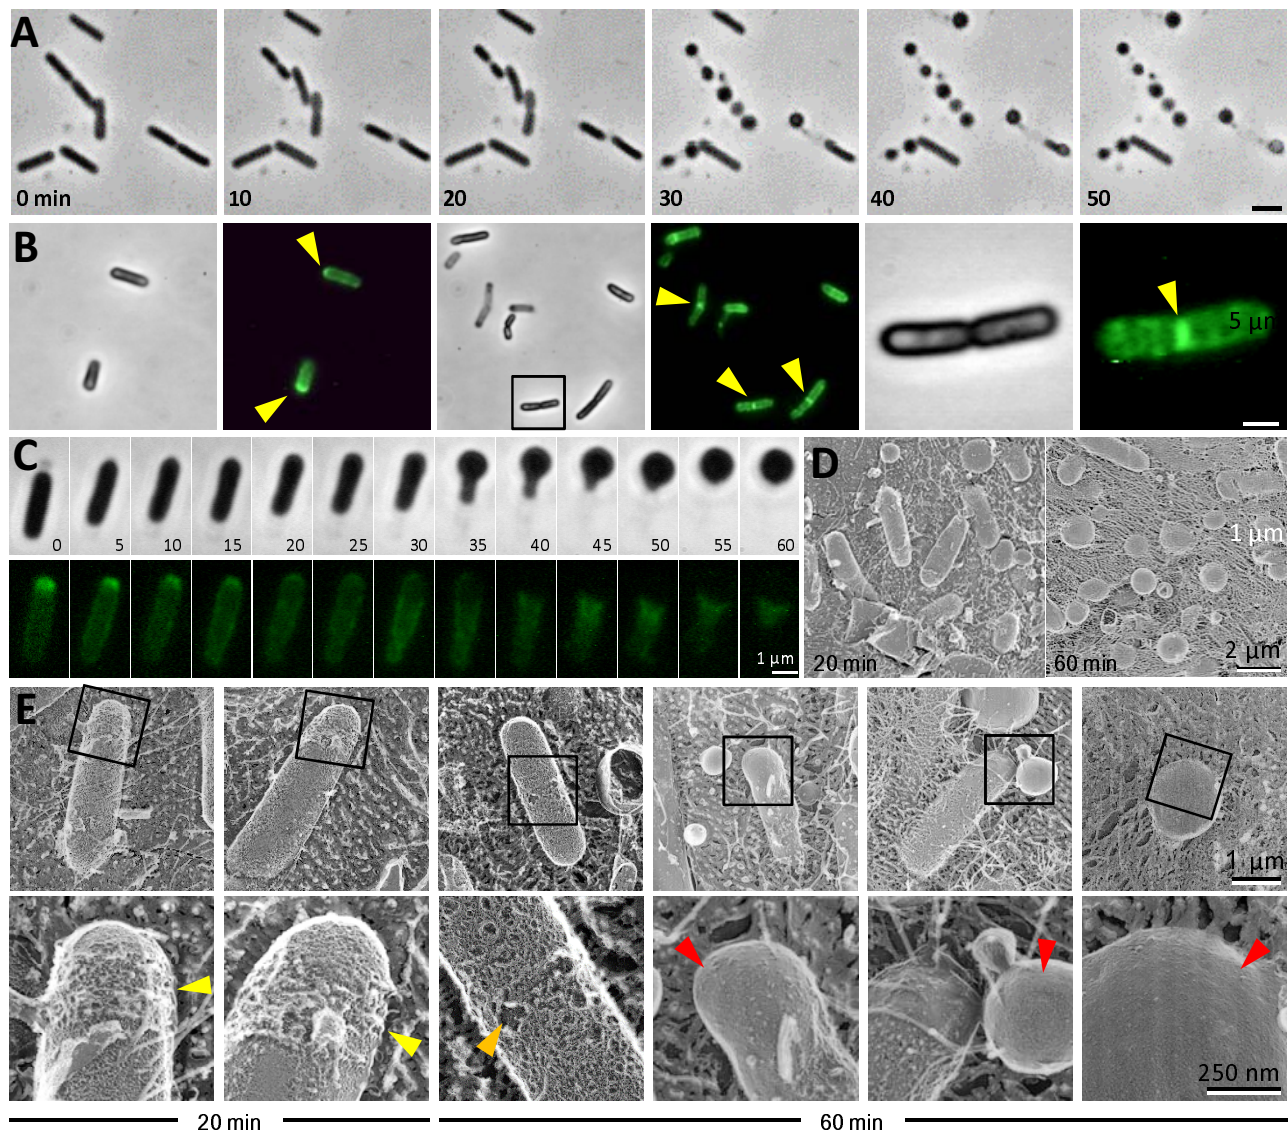

**Fig. 2.** Damages on cell structure by lysozyme. **A)** Phase-contrast microscopic images after addition of lysozyme taken with 10 minutes intervals. **B)** Localization of fluorescently labeled lysozyme on cell. Fluorescence of labeled lysozyme was visualized at 10 minutes after the addition. Phase-contrast and fluorescence images are shown as the left and the right panels, respectively in each of three image sets. A boxed cell in the middle-paired panels is magnified in the right panel set. The signals were found preferentially at a pole and the division site as marked by yellow triangles. **C)** Phase-contrast and fluorescence images of single cell treated by labeled lysozyme taken with 5-minutes intervals. **D)** Field image of cells treated with lysozyme for 20 and 60 minutes taken by the quick-freeze, deep-etch EM. The mica surface is covered by eutectics appearing as thin filaments. **E)** Quick-freeze, deep-etch EM images of cells treated with lysozyme for 20 and 60 minutes, as shown in the bottom. The focused regions boxed in the upper panels are magnified in the lower panels. Ruffling, coarse pattern and smooth surfaces are marked by yellow, orange and red triangles, respectively.



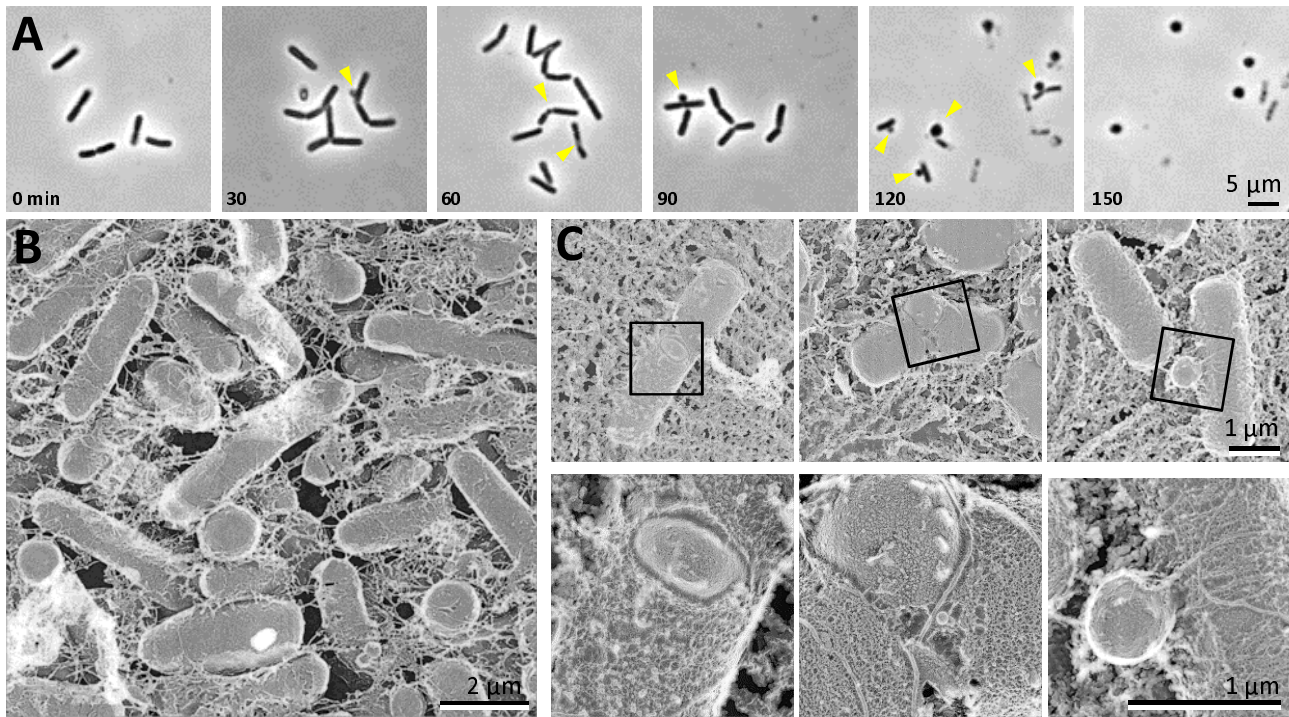

**Fig. 3.** Damages on cell structure by PenG. **A)** Phase-contrast microscopic images after addition of PenG taken at 30-minutes intervals. **B, C)** Quick-freeze, deep-etch EM images of cells treated with PenG for 120 minutes. **B)** Field image. **C)** Magnified cell images. The boxed regions in the upper panels are magnified more in the lower panels.

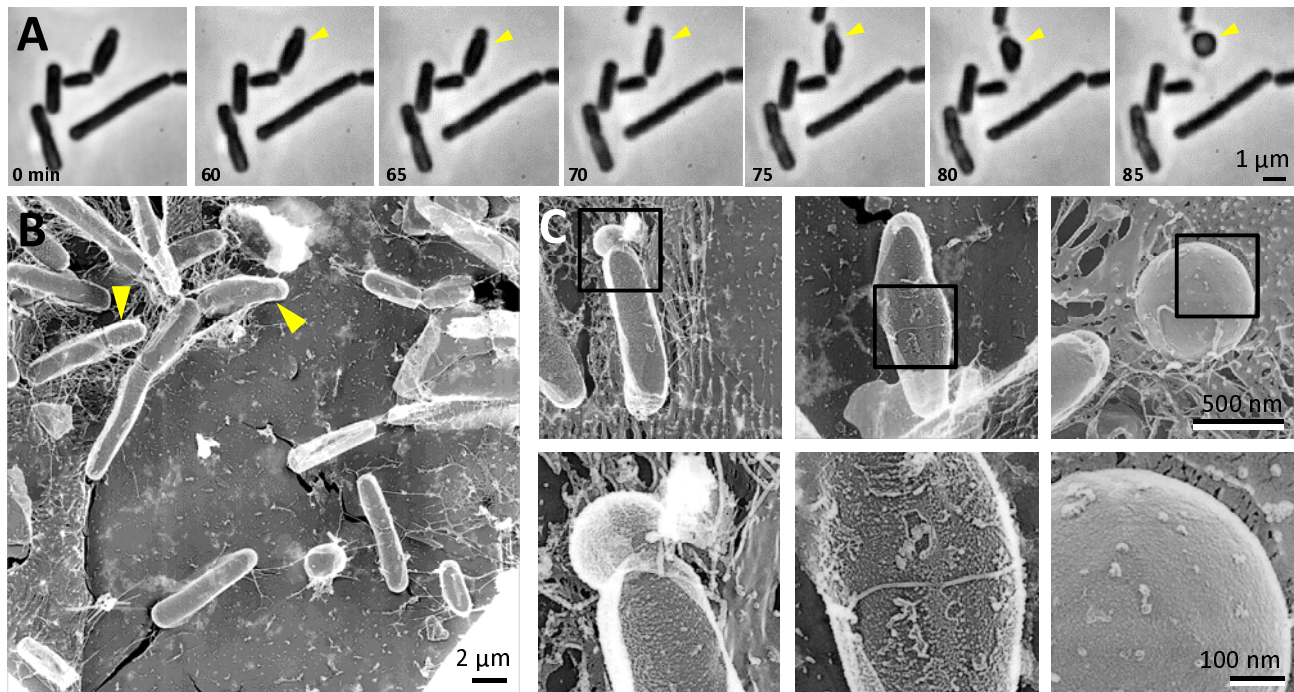

**Fig. 4.** Effects on cell structure by *murE* operon repression. **A)** Phase-contrast microscopic images taken at 5-minutes intervals at 60 minutes after repression. The cell marked by a yellow triangle changed its structure drastically. A tapered polar, a bulge, and swollen cells can be observed sequentially with time on the cell. **B, C)** Quick-freeze, deep-etch EM images of cells repressed for *murE* for 85 minutes. **C)** Cell features resulted by *murE* repression. The area boxed in the upper panels are magnified in the lower panels.

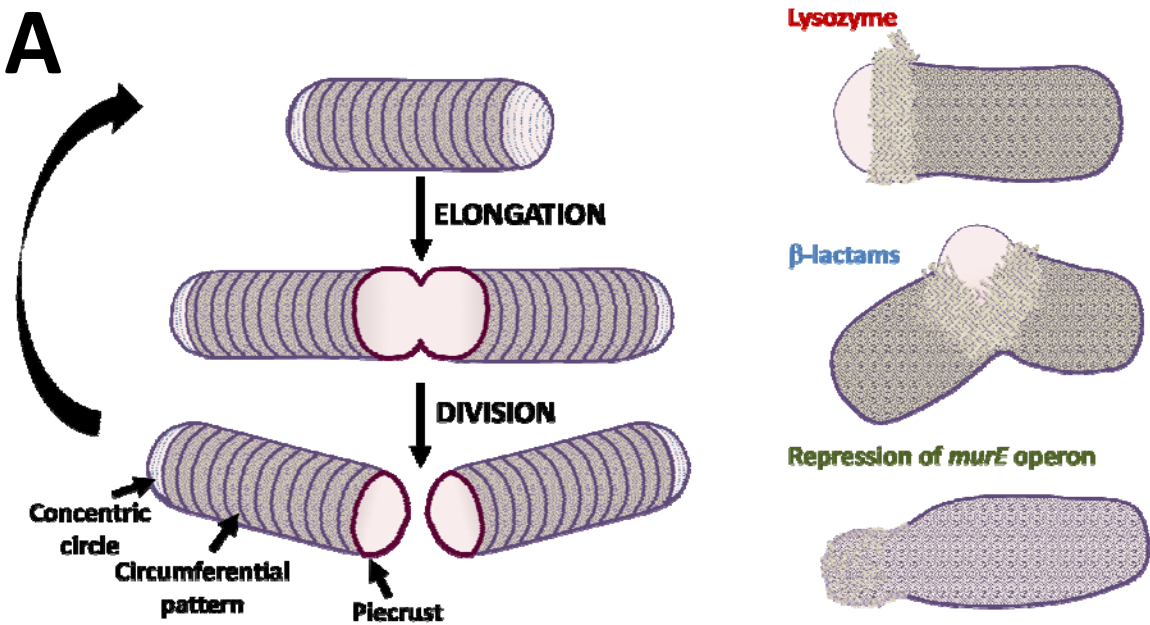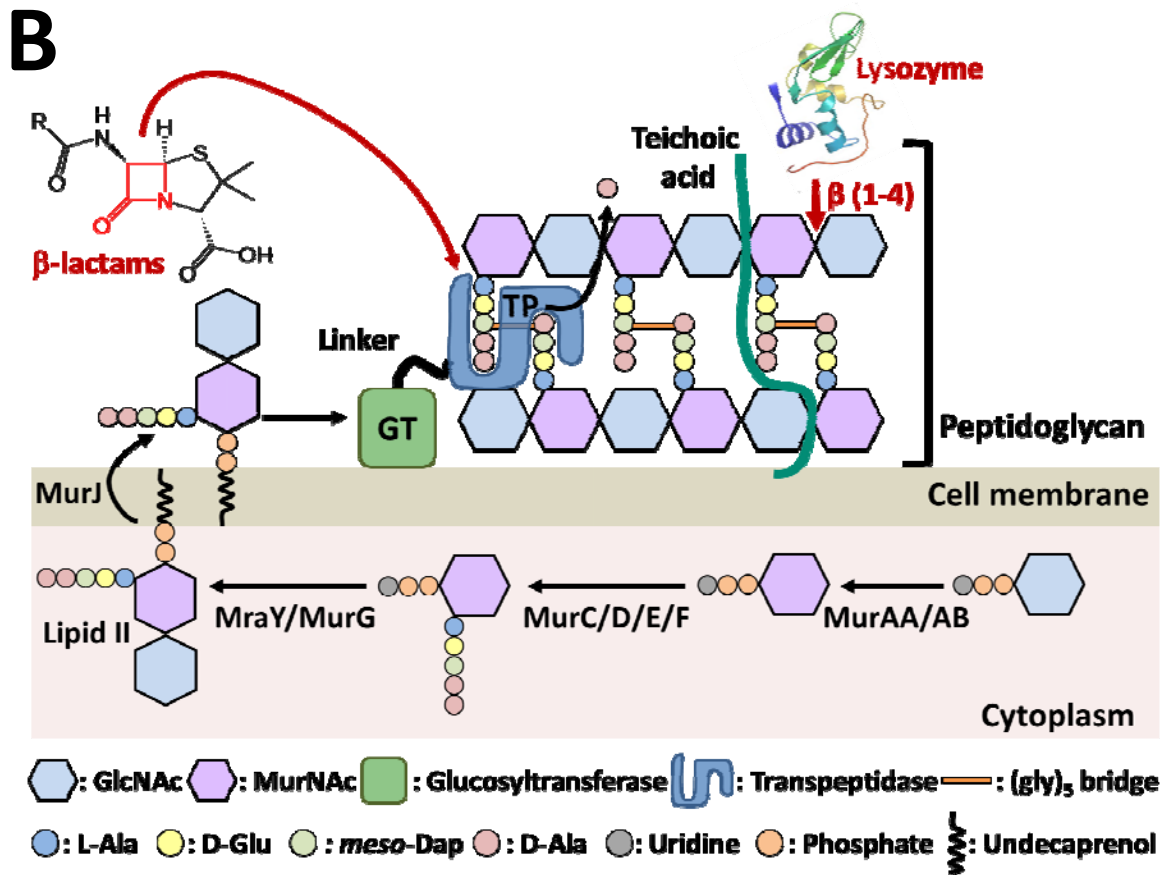

**Fig. 5.** Schematic presentations of peptidoglycan architecture and working points of inhibitory factors. **A)** Structural features on surfaces of cells in division cycle (left) and peptidoglycan disruption (right). **B)** Chemical processes. The peptidoglycan layer consists of strands of repeating GlcNAc and *N*-acetylmuramic acid MurNAc subunits. Transpeptidase (TP) forms a crosslink between two sugar chains by forming peptidoglycan network. Glycosyltransferase forms linkages between GlcNAc and MurNAc residues. Peptidoglycan synthesis starts in the cytoplasm, where the nucleotide precursors are synthesized by the Mur enzymes (MurA, MurB, MurC, MurD, MurE and MurF). A GlcNAc moiety is transferred by MurG, linked to the undecaprenyl phosphate (transport lipid I), resulting in anchoring to the cell membrane. The antibiotic beta-lactams represented by PenG bind to and inhibit the activity of the transpeptidase by forming a highly stable penicilloyl-enzyme intermediate. Lysozyme cleaves the bond between MurNAc and the fourth carbon atom of GlcNAc. The depletion of MurE blocks the supply of muropeptides.

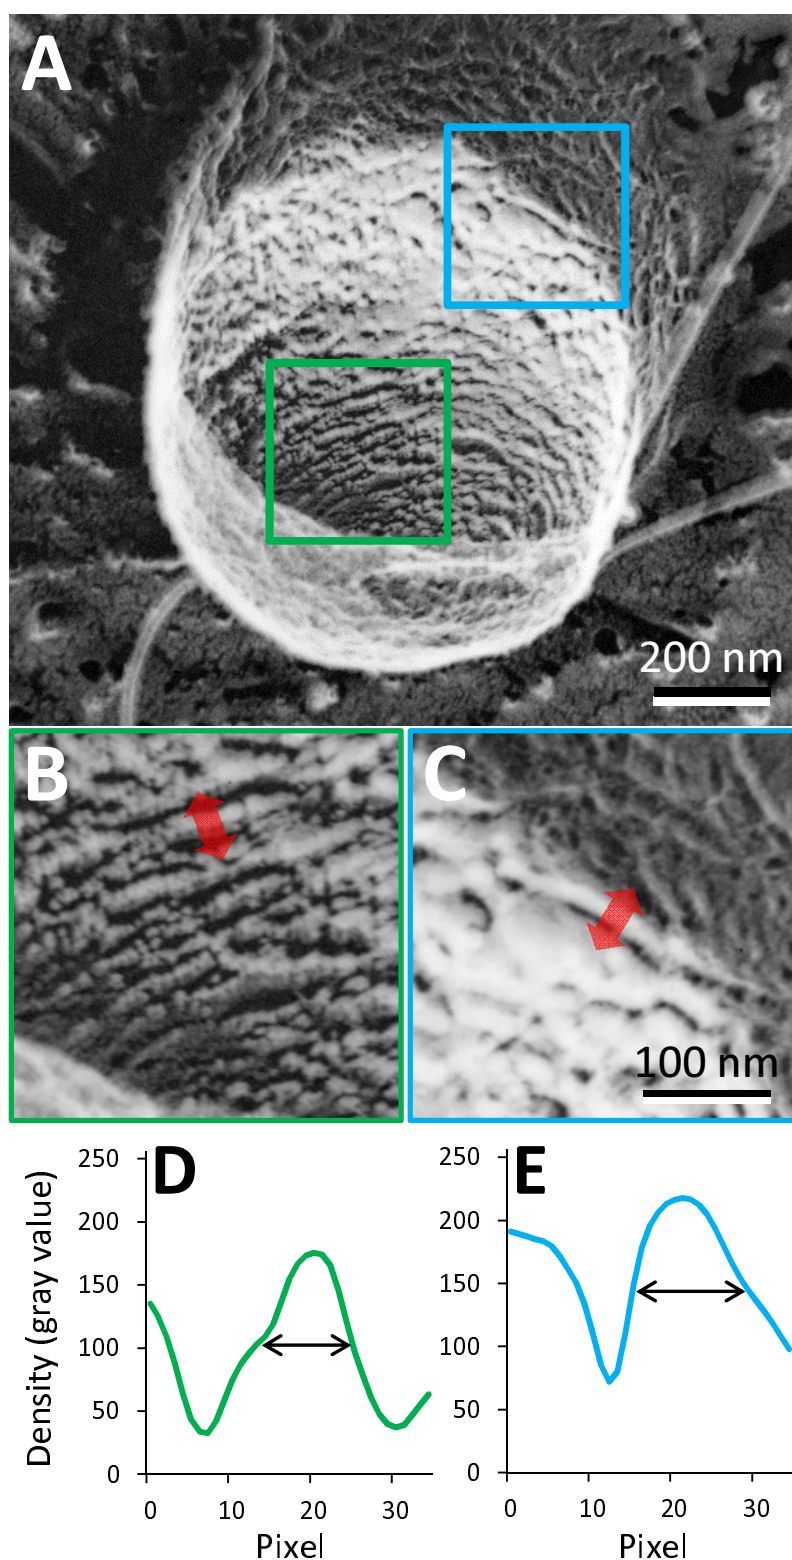

**Fig. S1.** Measurement of filament width. A) Cell surface image by quick-freeze, deep-etch EM. B, C) Magnified image of areas marked by colored box in panel (A). D, E) Image profiles of red arrow area in panels (B) and (C). The positions at the mid density was defined as the boundary of focusing filament.
